# Supplementary material for: TOPK promotes lung cancer resistance to EGFR tyrosine kinase inhibitors by phosphorylating and activating c-Jun
Source: PubMed Central journal article supplement (PMC4872746; doi:10.18632/oncotarget.6826), 2016-01-06
Supplement: oncotarget-07-6748-s001.pdf [file oncotarget-07-6748-s001.pdf]

## TOPK promotes lung cancer resistance to EGFR tyrosine kinase inhibitors by phosphorylating and activating c-Jun

### Supplementary Material

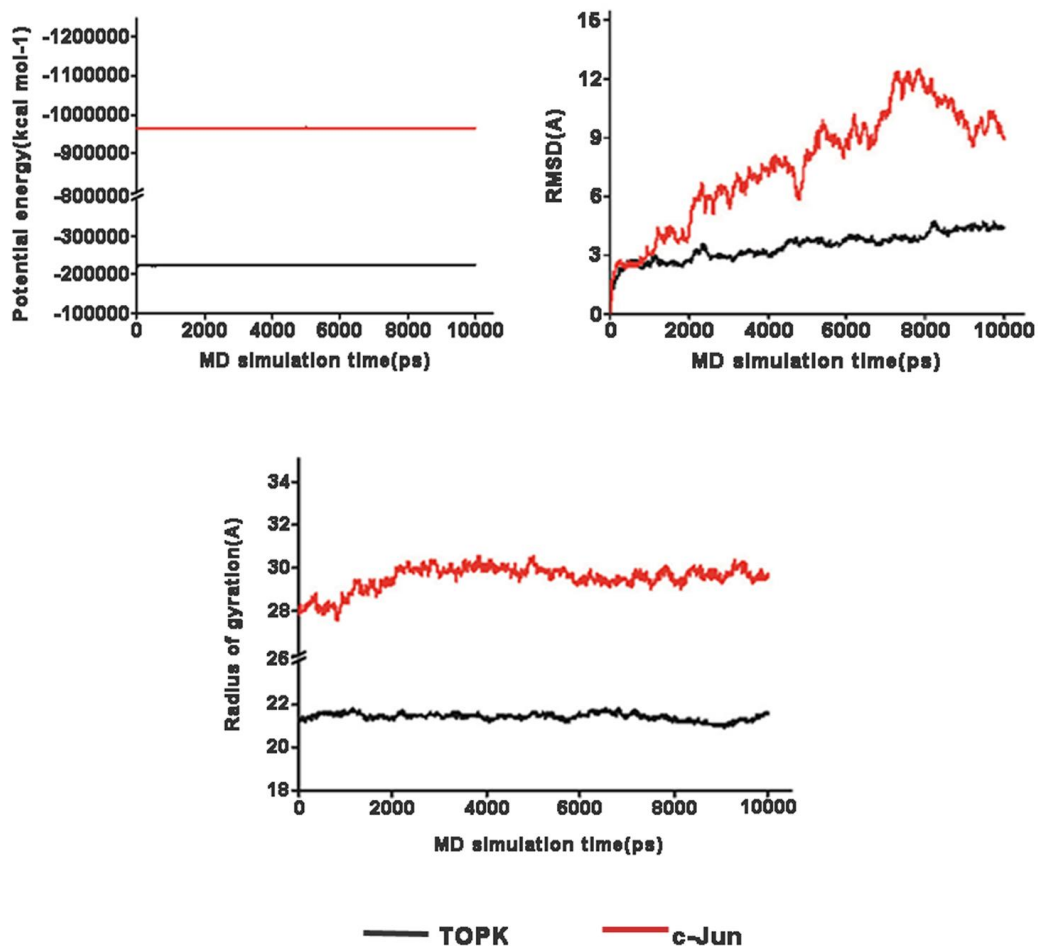

**Supplemental Figure S1.** Potential energy, backbone-atom RMSD and radius of gyration for TOPK (in black) and c-Jun (in red) proteins with respect to simulation time.

**A**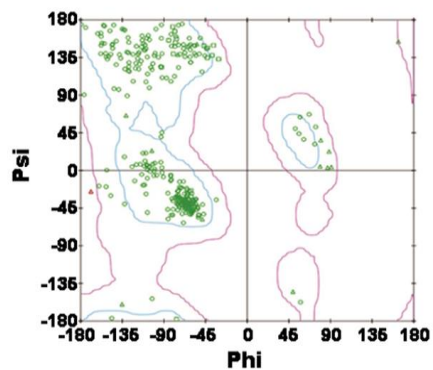**B**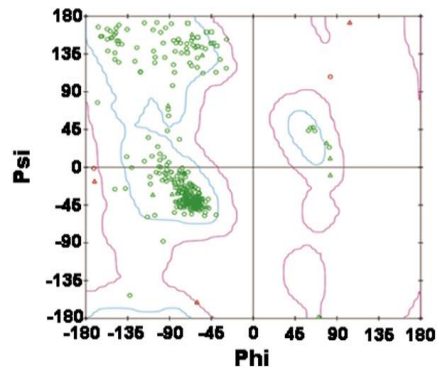**C**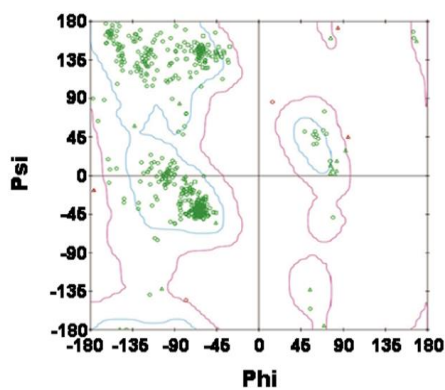

**Supplemental Figure S2.** Ramachandran plots of TOPK (A), c-Jun (B) and TOPK-c-Jun (C) after MD simulations. The Ramachandran plot shows the phi-psi torsion angles of all residues in the structure. The coloring/shading on the plot represents the different regions: the darkest areas (shown here in red) correspond to the "core" regions representing the most favorable combinations of phi-psi values. The percentage of residues in the "core" regions is one of the best indications of stereochemical quality.

**Supplemental Table 1.** Hydrogen bonds formed between TOPK and c-Jun

| <b>Receptor residue</b> | <b>Ligand residue</b> | <b>Interaction constituents</b><br>( Donor→ Acceptor) | <b>Distance</b><br>(Å) | <b>Angle</b><br>(°) |
|-------------------------|-----------------------|-------------------------------------------------------|------------------------|---------------------|
| TOPK:Arg130             | c-Jun:Asn85           | Arg130:HH22 - Asn85:OD1                               | 1.74                   | 162.9               |
| TOPK:Phe179             | c-Jun:Glu77           | Phe179:HN - Glu77:OE2                                 | 1.68                   | 158.8               |
| TOPK:Glu180             | c-Jun:Glu77           | Glu180:HN - Glu77:OE2                                 | 1.85                   | 137.7               |
| TOPK:Lys183             | c-Jun:Tyr10           | Lys183:HZ1 - Tyr10:OH                                 | 2.48                   | 111.4               |
| TOPK:Glu116             | c-Jun:Tyr10           | Tyr10:HH - Glu116:OE1                                 | 2.39                   | 124.5               |
| TOPK:Asp321             | c-Jun:Tyr28           | Tyr28:HH - Asp321:O                                   | 1.77                   | 138.5               |
| TOPK:Asp321             | c-Jun:Tyr28           | Tyr28:HH - Asp321:OXT                                 | 2.13                   | 152.2               |
| TOPK:Asp321             | c-Jun:Lys32           | Lys32:HZ2 - Asp321:OD2                                | 1.67                   | 155.3               |
| TOPK:Thr320             | c-Jun:Lys32           | Lys32:HZ3 – Thr320:O                                  | 1.77                   | 149.5               |
| TOPK:Glu180             | c-Jun:Lys35           | Lys35:HZ1 - Glu180:OE2                                | 1.56                   | 166.1               |
| TOPK:Asp321             | c-Jun:Lys35           | Lys35:HZ3 - Asp321:OXT                                | 1.63                   | 162.0               |
| TOPK:Leu56              | c-Jun:Lys50           | Lys50:HZ1 - Leu56:O                                   | 2.46                   | 106.5               |
| TOPK:Ser57              | c-Jun:Lys50           | Lys50:HZ1 - Ser57:O                                   | 1.80                   | 143.6               |
| TOPK:Ser52              | c-Jun:Lys50           | Lys50:HZ3 - Ser52:OG                                  | 2.12                   | 135.6               |
| TOPK:Val174             | c-Jun:Lys70           | Lys70:HZ1 – Val174:O                                  | 1.82                   | 153.6               |
| TOPK:Asp178             | c-Jun:Ala72           | Ala72:HN – Asp178:OD1                                 | 1.65                   | 175.5               |
| TOPK:Asp178             | c-Jun:Ser73           | Ser73:HN - Asp178:OD1                                 | 1.87                   | 163.3               |
